# Supplementary material for: Stabilizing protein pharmaceuticals by imidazolium-type zwitterions
Source: Royal Society of Chemistry journal article supplement (doi:10.1039/d4cp04439h), 2025-01-01
Supplement: d4cp04439h1.pdf [file d4cp04439h1.pdf]

## **Supporting information for**

Stabilizing protein pharmaceuticals by imidazolium-type zwitterions

Ai Tajiri, Takeru Ishizaki, Takahiro Takekiyo, Kazuaki Ninomiya, Kenji Takahashi, Kosuke

Kuroda\*

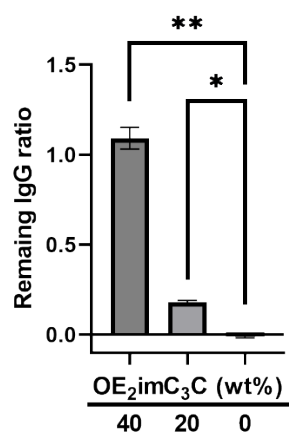

Figure S1 The remaining IgG ratio after shaking at 1,000 rpm and 80 °C for 2 h in OE<sub>2</sub>imC<sub>3</sub>C/PBS solutions. IgG did not dissolve in the 60 wt% OE<sub>2</sub>imC<sub>3</sub>C solution. Error bars represent the standard error. \*\* $p < 0.01$  and \* $p < 0.05$ , vs. 0 wt%.

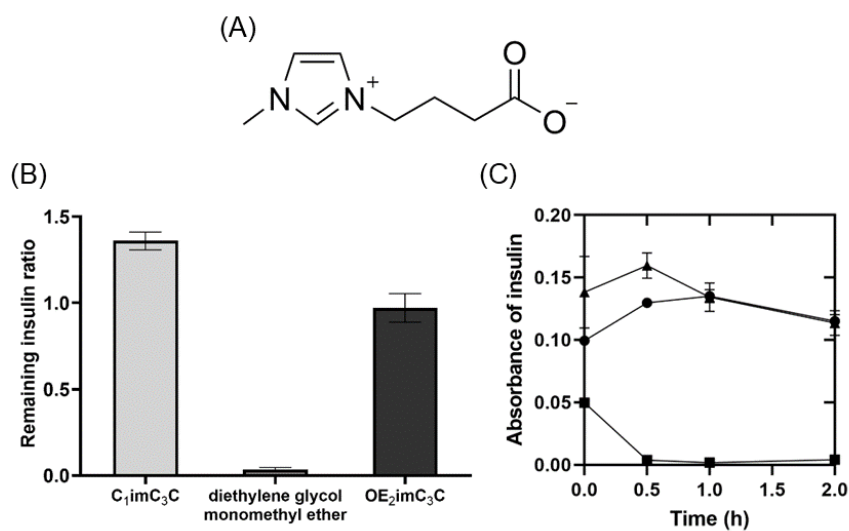

Figure S2 (A) Chemical structure of C<sub>1</sub>imC<sub>3</sub>C. (B) Remaining insulin ratio and (C) absorbance of insulin after shaking at 1,000 rpm and 80 °C for 1 h in C<sub>1</sub>imC<sub>3</sub>C (●), diethylene glycol monomethyl ether (■), or OE<sub>2</sub>imC<sub>3</sub>C (▲) solutions. Error bars represent the standard errors.

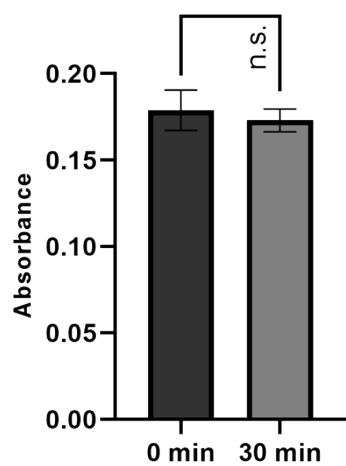

Figure S3 Absorbance derived from Bradford reagent (595 nm) after heating at 80 °C in the insulin/40 wt% OE<sub>2</sub>imC<sub>3</sub>C solution. Error bars represent the standard error. Data were analyzed using a paired *t* test.

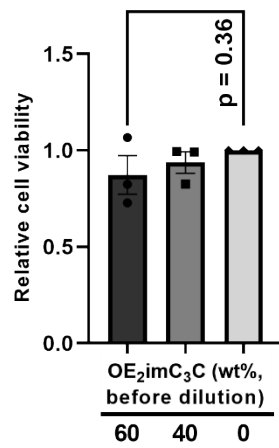

Figure S4 Relative cell viability after 6 days incubation in the serum-containing medium with

OE<sub>2</sub>imC<sub>3</sub>C after 714-fold dilution (biological triplicates). Error bars represent the standard error.

Data were analyzed using one-way ANOVA.
